# Supplementary material for: SENP7 senses oxidative stress to sustain metabolic fitness and antitumor functions of CD8+ T cells
Source: PubMed Central journal article supplement (PMC8970670; doi:10.1172/jci155224), 2022-04-01
Supplement: jci-132-155224-s032.pdf [file jci-132-155224-s032.pdf]

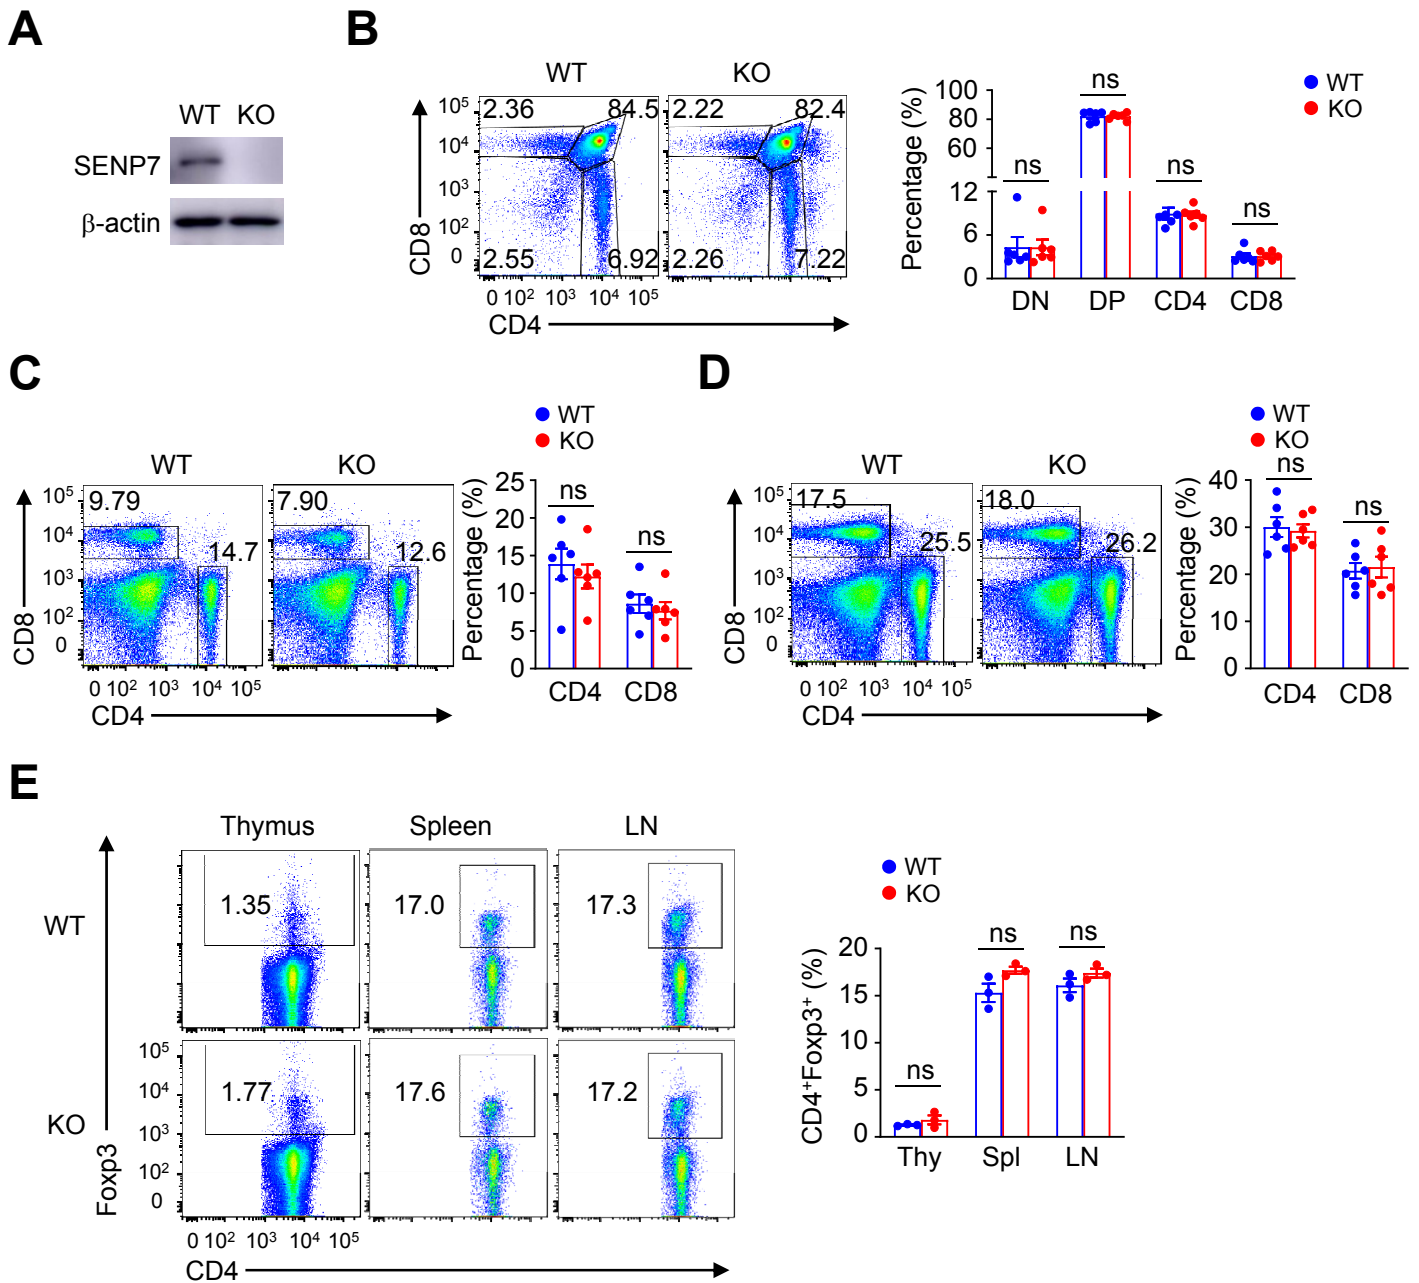

**Supplementary Figure 1. T cell development in *Senp7<sup>fl/fl</sup>Cd4-Cre* mice.** (A) *Senp7<sup>fl/fl</sup>* mice were crossed with *Cd4-Cre* mice to obtain *Senp7<sup>fl/fl</sup>* (designated wild-type (WT)) and *Senp7<sup>fl/fl</sup>Cd4-Cre* (designated knockout (KO)) mice. Immunoblot analysis of SENP7 in splenic CD8<sup>+</sup> T cells from WT and KO mice, showing T cell-specific SENP7 ablation. (B) Flow cytometric analysis of the percentage of CD4<sup>-</sup>CD8<sup>-</sup> (DN), CD4<sup>+</sup>CD8<sup>+</sup> (DP), CD4<sup>+</sup>CD8<sup>-</sup> (CD4), CD4<sup>-</sup>CD8<sup>+</sup> (CD8) cells from the thymus of 6-week-old WT and KO mice (n=5). (C and D) Flow cytometric analysis of the percentage of CD4<sup>+</sup> and CD8<sup>+</sup> T cells from the spleen (C) and lymph nodes (D) of 6-week-old WT and KO mice (n=6). (E) Flow cytometric analysis of the percentage of CD4<sup>+</sup>Foxp3<sup>+</sup> T cells in the thymus (Thy), spleen (Spl) and lymph node (LN) of 6-week-old WT and KO mice (n=3). Data are representative of three independent experiments. ns, not statistically significant; Student's *t* test.

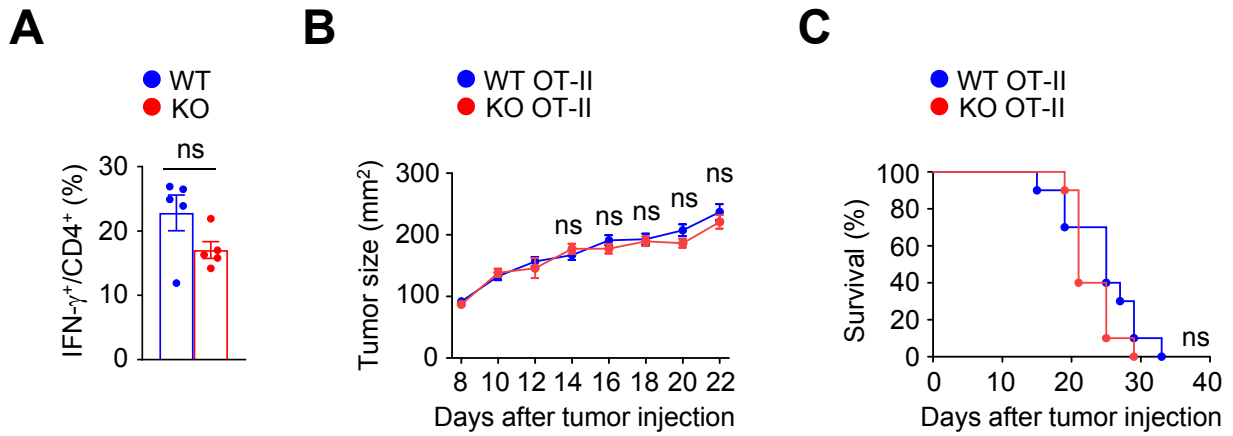

**Supplementary Figure 2. Role of SENP7 in CD4<sup>+</sup> T cell antitumor activity.** (A) Flow cytometric analysis of IFN- $\gamma$ -producing CD4<sup>+</sup> T cells in tumors of WT and KO mice injected s.c. with MC38 tumor cells (day 14, n=5). (B and C) Tumor growth and survival curves of B6.SJL mice injected s.c. with MC38-OVA cancer cells adoptively transferred with WT OT-II or *Senp7*<sup>fl/fl</sup>Cd4-Cre (KO) OT-II CD4<sup>+</sup> T cells on day 7 after tumor cell inoculation (n=10). Data are representative of three independent experiments. ns, not statistically significant. (A) and (B) were analyzed by two-tailed Student's *t* test; (C) was analyzed by log-rank (Mantel-Cox) test.

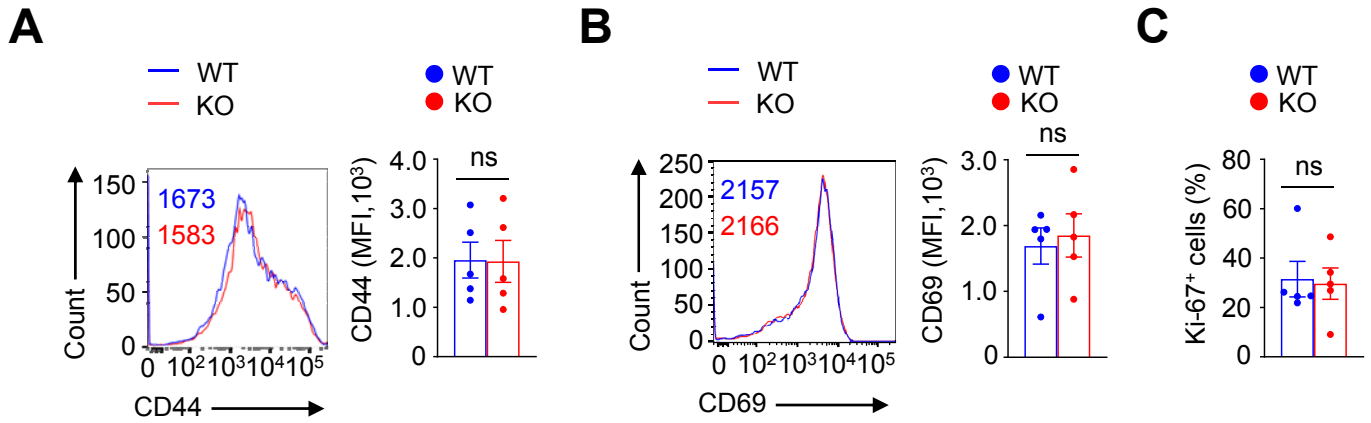

**Supplementary Figure 3. SENP7 is not required for CD8<sup>+</sup> T cell activation or CD4<sup>+</sup> T cell proliferation.** (A and B) Flow cytometric analysis of CD44 (A) and CD69 (B) expression in WT and KO CD8<sup>+</sup> T cells stimulated with anti-CD3 and anti-CD28 antibodies for 1 day (n=5). (C) Flow cytometric analysis of the frequency of Ki-67-positive WT and KO CD4<sup>+</sup> T cells stimulated with anti-CD3 and anti-CD28 antibodies for 2 days (n=5). Data are representative of three independent experiments and are presented as means  $\pm$  SEM. ns, not statistically significant; Student's *t* test.

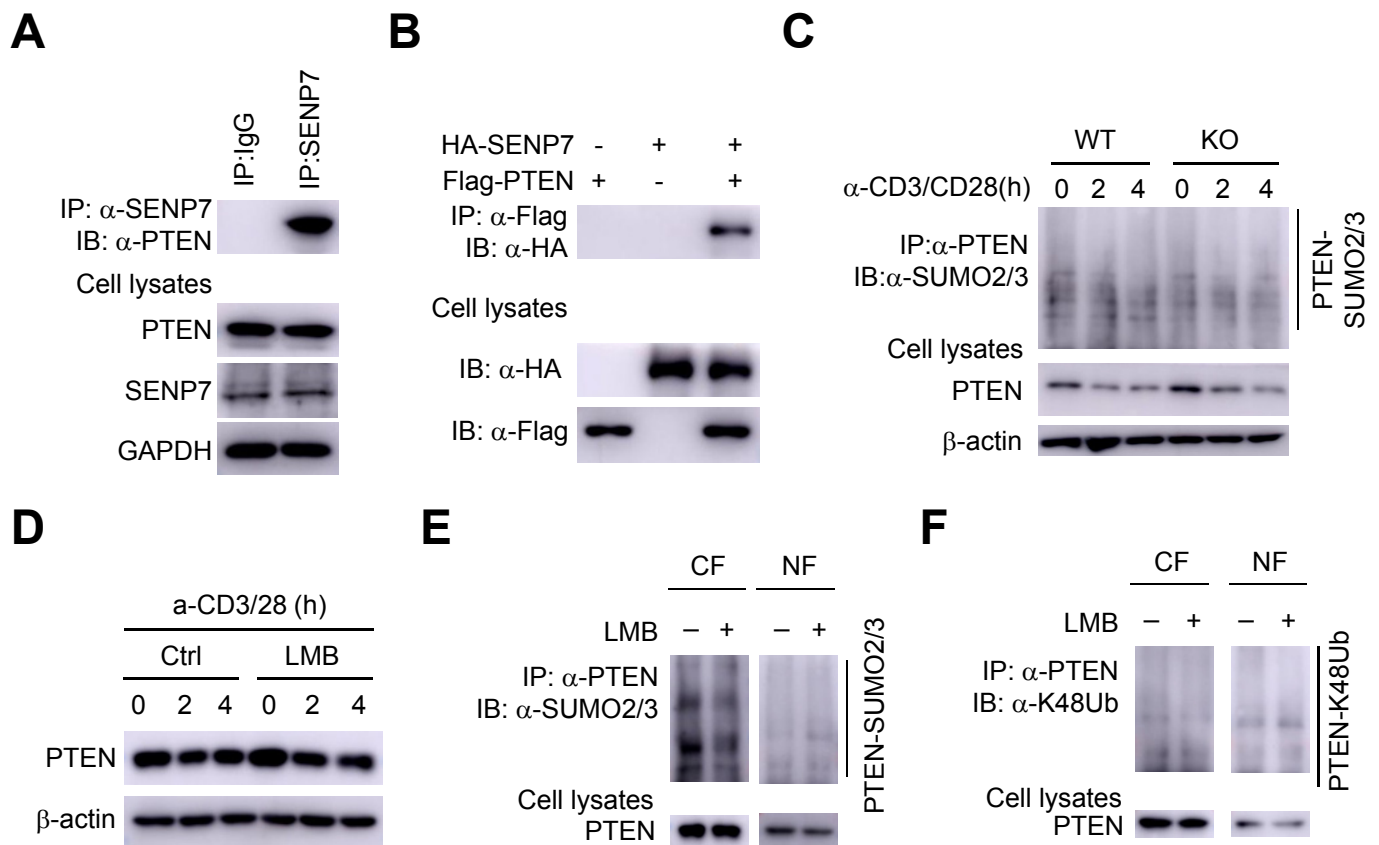

**Supplementary Figure 4. PTEN activity in T cells.** (A) WT CD8<sup>+</sup> T cells stimulated with anti-CD3 and anti-CD28 antibodies for 1 hour were immunoprecipitated with anti-SEN7 and assessed by IB with anti-PTEN. (B) HEK293T cells co-transfected with Flag-tagged PTEN together with HA-tagged SEN7 were immunoprecipitated with anti-Flag and assessed by IB with anti-HA. (C) PTEN SUMOylation assays performed by immunoprecipitating PTEN under denaturing conditions and then detecting the SUMOylated PTEN using anti-SUMO2/3 antibody in CD4<sup>+</sup> T cells stimulated with anti-CD3 and anti-CD28. (D) Immunoblot analysis of the indicated proteins in SENP7-deficient CD8<sup>+</sup> T cells stimulated with anti-CD3 and anti-CD28 plus LMB for 0, 2 and 4 hours. (E and F) PTEN SUMOylation (E) and ubiquitination (F) assays using nuclear (NF) and cytoplasmic (CF) fractions of SENP7-deficient CD8<sup>+</sup> T cells stimulated with anti-CD3 and anti-CD28 antibodies plus LMB for 2 hours. Data are representative of three independent experiments.

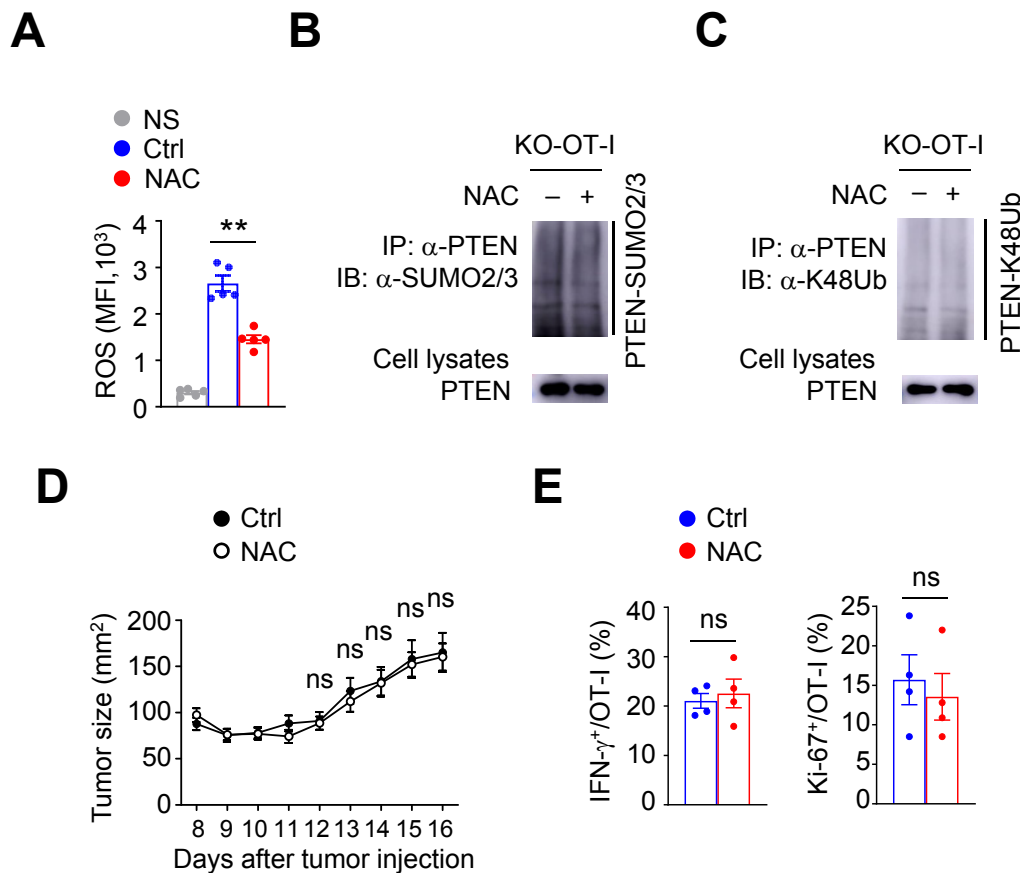

**Supplementary Figure 5. Role of ROS in WT and SENP7-deficient OT-I cells. (A)** Quantification of MFI of ROS production in wild-type OT-I cells stimulated with anti-CD3 and anti-CD28 plus 10 mM NAC for 8 hours in vitro (n=5). NS, non-stimulation with anti-CD3 and anti-CD28; Ctrl, stimulation with anti-CD3 and anti-CD28; NAC, stimulation with anti-CD3 and anti-CD28 plus NAC treatment. **(B and C)** PTEN SUMOylation **(B)** and ubiquitination **(C)** assays using SENP7-deficient OT-I cells stimulated with anti-CD3 and anti-CD28 antibodies plus NAC for 2 hours. **(D)** Tumor growth of MC38-OVA tumor-bearing WT mice (day 6 after tumor cell inoculation) injected intravenously with SENP7-deficient OT-I cells stimulated with anti-CD3 and anti-CD28 plus 10 mM NAC for 8 hours in vitro (n=8). **(E)** Flow cytometric analysis of the frequency of IFN- $\gamma$ -producing and Ki-67-positive SENP7-deficient OT-I cells in the tumors of mice from **(D)** (day 17 after tumor injection) (n=4). Data are representative of three independent experiments and are presented as means  $\pm$  SEM. The *P* value in **(A)** was determined by 1-way ANOVA with Tukey's multiple comparisons test. Student's *t* test was used in **(D)** and **(E)**. ns, not statistically significant. \*\**P* < 0.01.
